# Supplementary material for: Hierarchical (ZnO/ZnFe₂O₄/α-Fe₂O₃)–TiO₂ heterostructures with Strain-Tunable Photoluminescence
Source: Research Square preprint supplement (doi:10.21203/rs.3.rs-8224513/v1), 2025-12-03
Supplement: Supplementary file 1 [file a1fc520fffe8205c0862fb77.docx]

**Supplementary Material**

**Hierarchical (ZnO/ZnFe₂O₄/α-Fe₂O₃)–TiO₂ heterostructures with Strain-Tunable Photoluminescence**

Koushik Saikia1,2*,Subrata Biswas2, Jayanta Hazarika3, Perumal Alagarsamy2

1 Department of Physics, The Assam Royal Global University, Guwahati- 781035, Assam, India

2 Department of Physics, Indian Institute of Technology, Guwahati, Guwahati- 781039, Assam, India

3Material Science Laboratory, Department of Physics, Pandu College, Guwahati-781012, Assam, India

*Correspondence address: [ksaikia3@rgu.ac](mailto:ksaikia3@rgu.ac)


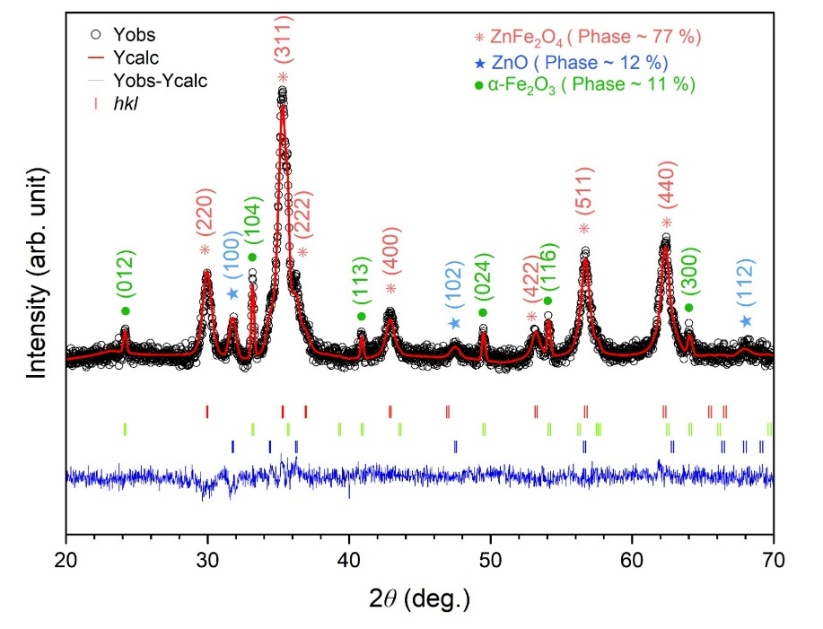


**Figure S1**

**Figure S1** presents the Rietveld refinement of the XRD pattern for the ZF sample, revealing the presence and relative phase percentages of ZnFe₂O₄, ZnO, and α-Fe₂O₃. The good agreement between the experimental and calculated diffraction profiles confirms the successful fitting, indicating that the sample primarily consists of the spinel ZnFe₂O₄ phasealong with minorcontributions from ZnO and α-Fe₂O₃.


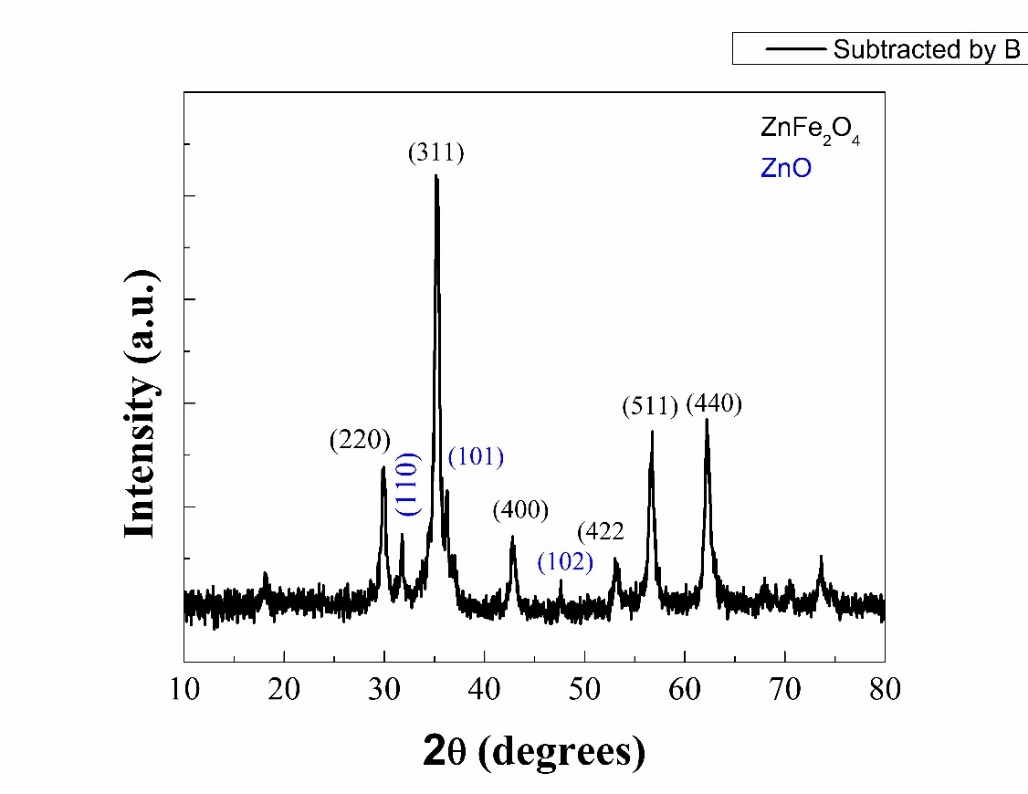


**Figure S2**

**Figure S2** shows the XRD pattern of the sample which was prepared by annealing Fe-Zn glycolate at 400 °C. Based on this result a plausible mechanism has been proposed regrading the formation ZnO and subsequently both ZnO and α-Fe₂O₃ along with ZnFe2O4 after annealing of Fe-Zn glycolate at 500 °C.

**
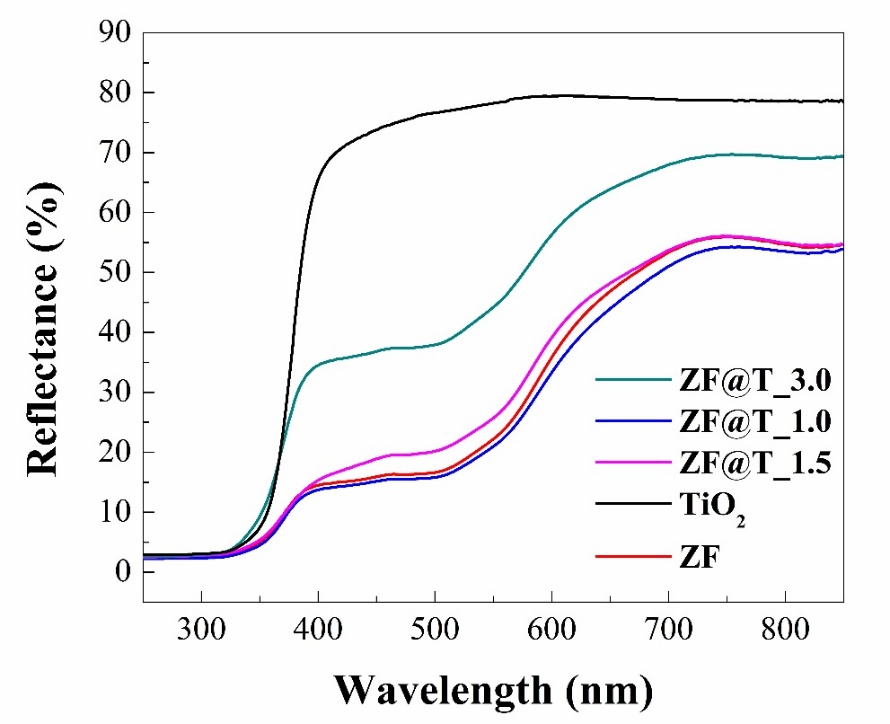
**

**Figure S3**

**Figure S3** shows the reflectance data from which Kubelka Munk plots have been obtained.
